# Supplementary material for: A Pathway of Excellence in Organ Donation and Transplantation: A novel curricular design
Source: Research Square preprint supplement (doi:10.21203/rs.3.rs-7200195/v1), 2025-09-11
Supplement: Supplementary file 1 [file 48e98d067da66e389034b4ab.pdf]

## Supplement Appendix B: PFD interview guide

Participant ID \_\_\_\_\_

Date of Interview \_\_\_\_\_

Time started: \_\_\_\_\_ Time ended: \_\_\_\_\_

### 1. Introduction

- a. Introduce interviewer
- b. Thank participant for participation
- c. Purpose of the study
- d. Remind them of strict confidentiality
  - Names won't be used in the written transcription or in the data analysis
- e. Taping of the interview for the purpose of data collection and accurate transcription

Thank you very much for agreeing to be a part of this interview and study. The results of this study will help us develop training pathway for medical students. This training will help them to be better prepared to discuss topics around organ donation and transplantation. If you feel uncomfortable about the questions or if you need a break from the questions, we can take a pause. If it any time you would like to end the interview, we will.

- f. Demographic questions (it is ok to not want to answer some of these questions)
  - Rural/urban place of residence
  - Your sex and gender (man, woman, non-binary)
  - Your age
  - Your level of education
  - Your ethnicity
  - Your relationship with the donor (if applicable-for deceased donor families only)

### 2. Questions for deceased donor families only.

- a. If you are comfortable with it, could you please share your story about your loved one and the decision to donate?
- b. How easy or difficult was this decision? (Please describe)
- c. Had your loved one shared their decision around organ donation with you prior to them getting sick? (Please describe)
- d. What information was shared with you around organ donation and how was the information delivered?
- e. How did you feel about the information around organ donation that was being shared with you?
  - Potential probes: Did it make sense? Did it cover everything you felt you needed to know? Was it confusing?

- f. Was there a healthcare member that you felt most comfortable with around this conversation? Were they a doctor (family doctor, ICU doctor), social worker, coordinator/nurse?
    - What did they do to make you feel this way?
  - g. Was there a healthcare member that you felt the least comfortable with around this conversation? Were they a doctor (family doctor, ICU doctor), social worker, coordinator/nurse?
    - What did they do to make you feel this way?
  - h. What (if anything) helped you the most to make you feel comfortable?
  - i. We have discussed your personal experience with discussions around organ donation. How might these conversations and/or this experience be improved?
    - In your opinion, during your journey, when is the best time for these discussions regarding organ donation?
    - Who would you prefer to have these discussions with?
    - What information should be provided in these discussions?
  - j. Just to review with you, the reason for this study is to put together a curriculum or course work during medical school that helps students learn more about organ donation and transplantation. What do you think medical students should learn through their training to help this experience for other families to feel comfortable?
3. Questions for live kidney donors only.
- a. If you are comfortable with it, could you please share your story about your decision to donate?
  - b. How easy or difficult was this decision? (Please describe)
  - c. What information was shared with you around organ donation and how was the information delivered?
  - d. How did you feel about the information around organ donation that was being shared with you?
    - Potential probes: Did it make sense? Did it cover everything you felt you needed to know? Was it confusing?
  - e. Was there a healthcare member that you felt the most comfortable with around this conversation? Were they a doctor (family doctor, transplant nephrologist, transplant surgeon), social worker, coordinator/nurse?
    - What did they do to make you feel this way?
  - f. Was there a healthcare member that you felt the least comfortable with around this conversation? Were they a doctor (family doctor, transplant nephrologist, transplant surgeon), social worker, coordinator/nurse?
    - What did they do to make you feel this way?
  - g. What (if anything) helped you the most to make you feel comfortable?
  - h. We have discussed your personal experience with discussions around organ donation. How might these conversations and/or this experience be improved?
    - In your opinion, during your journey, when is the best time for these discussions regarding organ donation?

- Who would you prefer to have these discussions with?
  - What information should be provided in these discussions?
- i. Just to review with you, the reason for this study is to put together a curriculum or course work during medical school that helps students learn more about organ donation and transplantation. What do you think medical students should learn through their training to help this experience for other donors who are thinking about kidney donation?
4. Questions for kidney transplant recipients from a donated organ that came from a deceased donor only.
    - a. Could you please briefly describe your transplant journey and how long have you had your kidney transplant?
    - b. What information was shared with you around kidney transplants and how was the information delivered?
    - c. How did you feel about the information around kidney transplant that was being shared with you?
      - Potential probes: Did it make sense? Did it cover everything you felt you needed to know? Was it confusing?
    - d. Was there a healthcare member that you felt the most comfortable with around this conversation? Were they a doctor (family doctor, transplant nephrologist, transplant surgeon), social worker, coordinator/nurse?
      - What did they do to make you feel this way?
    - e. Was there a healthcare member that you felt the least comfortable with around this conversation? Were they a doctor (family doctor, transplant nephrologist, transplant surgeon), social worker, coordinator/nurse?
      - What did they do to make you feel this way?
    - f. What (if anything) helped you the most to make you feel comfortable?
    - g. We have discussed your personal experience with discussions around kidney transplants. How might these conversations and/or this experience be improved?
      - In your opinion, during your journey, when is the best time for these discussions regarding organ donation?
      - Who would you prefer to have these discussions with?
      - What information should be provided in these discussions?
    - h. Just to review with you, the reason for this study is to put together a curriculum or course work during medical school that helps students learn more about organ donation and transplantation. What do you think medical students should learn through their training to help this experience for other transplant recipients families feel comfortable?
  5. Ending
 

That concludes all of our questions. Do you have any other questions or comments? Is there anything else you would like to tell us that you think is important?
