# Supplementary material for: A Pathway of Excellence in Organ Donation and Transplantation: A novel curricular design
Source: Research Square preprint supplement (doi:10.21203/rs.3.rs-7200195/v1), 2025-09-11
Supplement: Supplementary file 2 [file 5fa6bb2d9f11c751570c3cde.pdf]

## **Supplement Appendix A: Healthcare provider interview guide**

### **Organ Donation and Transplantation in the Saskatchewan Medical Curriculum**

#### **Template for Course Proposal Interview**

Date:

1. ID Info (Name, Position)
2. What are the most important learning objectives in terms of knowledge and skills that you think should be met when teaching organ donation and transplantation to medical students in their first two years of undergraduate medical education?
3. How does this differ upon graduation from medicine?
4. In what courses and using what means do you think that these objectives regarding organ donation, procurement, and transplantation should be taught in the medical curriculum?
5. What is your overall impression of the McGill (Chen et al) course proposal? Things that should be kept, removed, changed? I can infer some answers from previous questions.
6. What do you think of the suggested time commitment for organ donation, procurement, and transplantation in the first two years of medical education?
7. What is your overall impression of the Saskatchewan curricular map? Things that should be kept, removed, changed? I can infer some answers from previous questions.
8. Would you like to review the modified course proposal developed by this team once it is created?

Yes/no

9. Is there anything that we didn't talk about today that you think would be important for the development of this course proposal?
